# Supplementary material
Source: PubMed Central journal article supplement (PMC3353010)
Supplement: NIHMS369013-supplement-1_si_001.pdf [file NIHMS369013-supplement-1_si_001.pdf]

1 Supplementary material

2 Bioavailability, toxicity, and bioaccumulation of quantum dot nanoparticles to the amphipod

3 *Leptocheirus plumulosus*

4 Brian P. Jackson<sup>1\*</sup>, Deenie Bugge<sup>2</sup>, James F. Ranville<sup>3</sup>, Celia Y. Chen<sup>2</sup>.

5 <sup>1</sup>Trace Element Analysis Core, Department of Earth Sciences, Dartmouth College, Hanover, NH 03755

6 <sup>2</sup>Department of Biology, Dartmouth College, Hanover, NH 03755.

7 <sup>3</sup>Department of Chemistry and Geochemistry, Colorado School of Mines, Golden, CO 80401

8

9 [BPJ@Dartmouth.edu](mailto:BPJ@Dartmouth.edu)

10 Tel: 603-646-1272

11 Fax:603-646-3922

12

13 3 pages (including this cover sheet) and two figures.

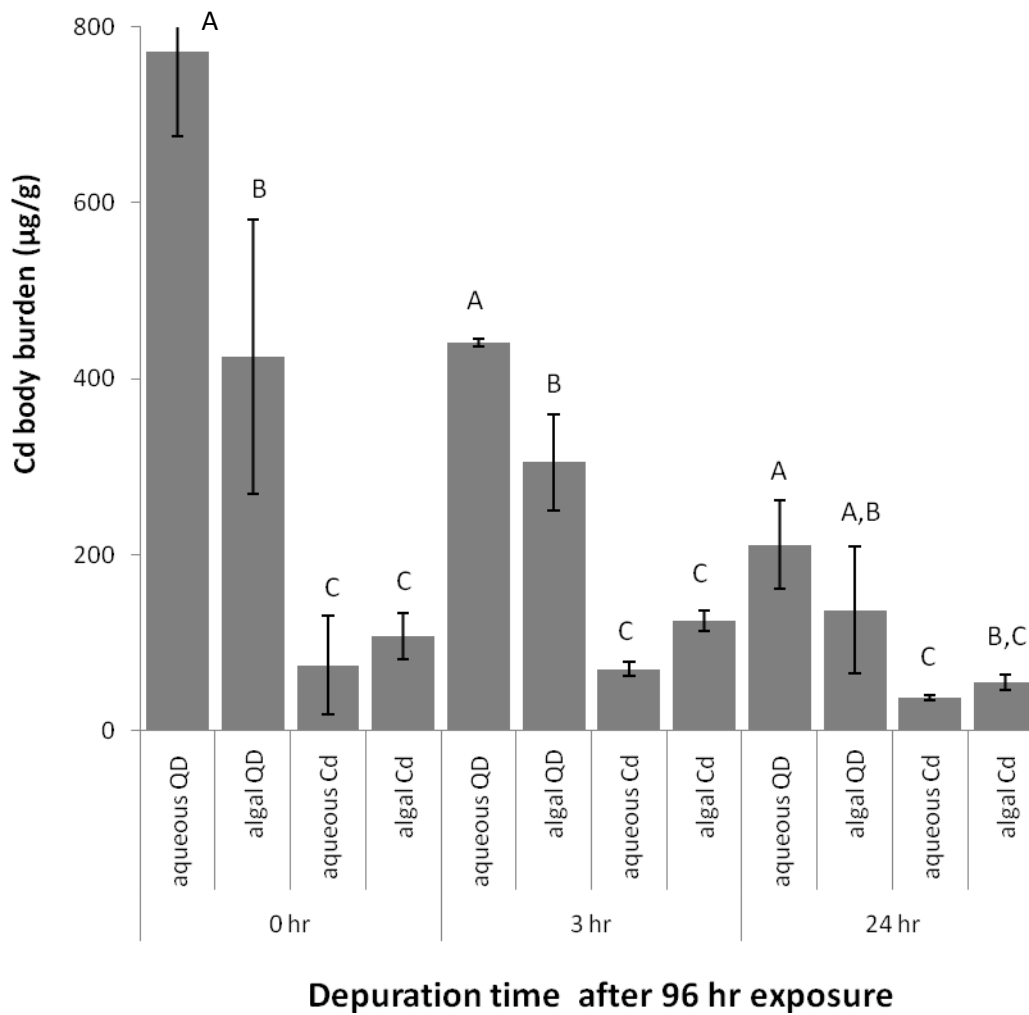

15

16

17

18 Supplemental Figure 1: Cd concentrations in *L. plumulosus* ( $\mu\text{g g}^{-1}$  DW) exposed to Cd in QDs or as  $\text{CdCl}_2$   
 19 in food or water after 96 hr exposure duration and 24 hour depuration. Treatments include: aqueous-  
 20 QD (no algae), algal-QD (algae exposed to QD), aqueous-Cd ( $\text{CdCl}_2$ , no QD, no algae), algal-Cd (algae  
 21 exposed to  $\text{CdCl}_2$ ). Within any of the three time points, means designated by the same letter are not  
 22 significantly different.

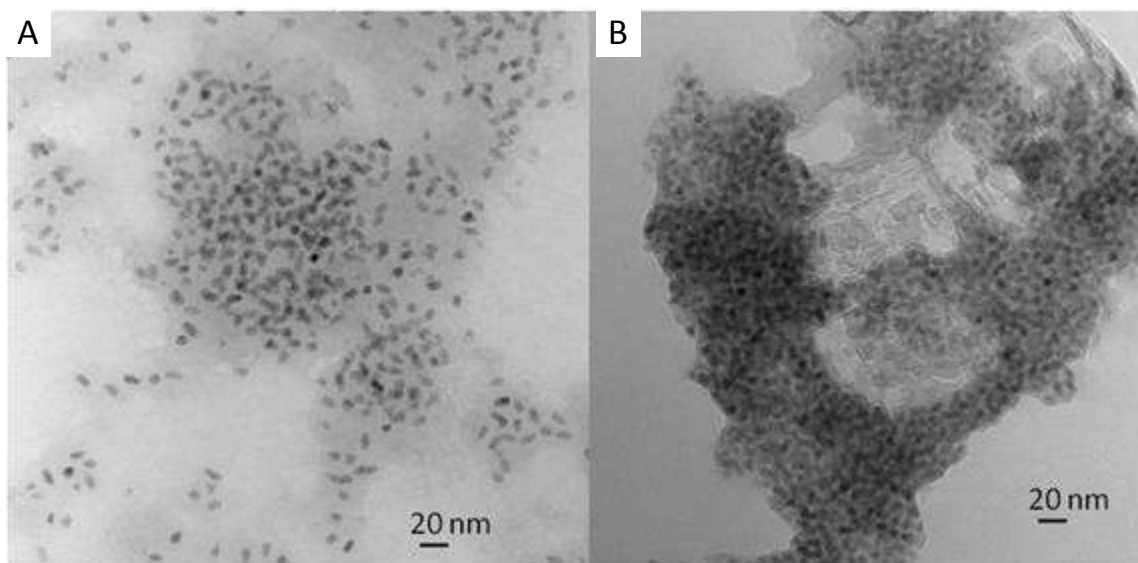

23

24

25 Supplemental Figure 2. TEM images of QDs in aqueous (A) and algal (B) suspensions.

26
